# Supplementary material for: Impact of High-Molecular-Weight Hyaluronic Acid on Gene Expression in Rabbit Achilles Tenocytes In Vitro
Source: MDPI journal article supplement (doi:10.3390/ijms23147926), 2022-07-18
Supplement: s1 [file s1]

# Supporting Information

## Impact of High-Molecular-Weight Hyaluronic Acid on Gene Expression in Rabbit Achilles Tenocytes In Vitro

Iris Miescher <sup>1</sup>, Petra Wolint <sup>1</sup>, Christine Opelz <sup>1</sup>, Jess G. Snedeker <sup>2</sup>, Pietro Giovanoli <sup>1</sup>,  
Maurizio Calcagni <sup>1</sup> and Johanna Buschmann <sup>1,\*</sup>

<sup>1</sup> Division of Plastic Surgery and Hand Surgery, University Hospital Zurich, Sternwartstrasse 14, 8091 Zurich, Switzerland; iris.miescher@usz.ch (I.M.); petra.wolint@usz.ch (P.W.); christine.opelz@web.de (C.O.); pietro.giovanoli@usz.ch (P.G.); maurizio.calcagni@usz.ch (M.C.)

<sup>2</sup> Orthopaedic Biomechanics, University Clinic Balgrist, Forchstrasse 340, 8008 Zurich, Switzerland; jess.snedeker@hest.ethz.ch

\* Correspondence: johanna.buschmann@usz.ch; Tel.: +41-44-255-98-95

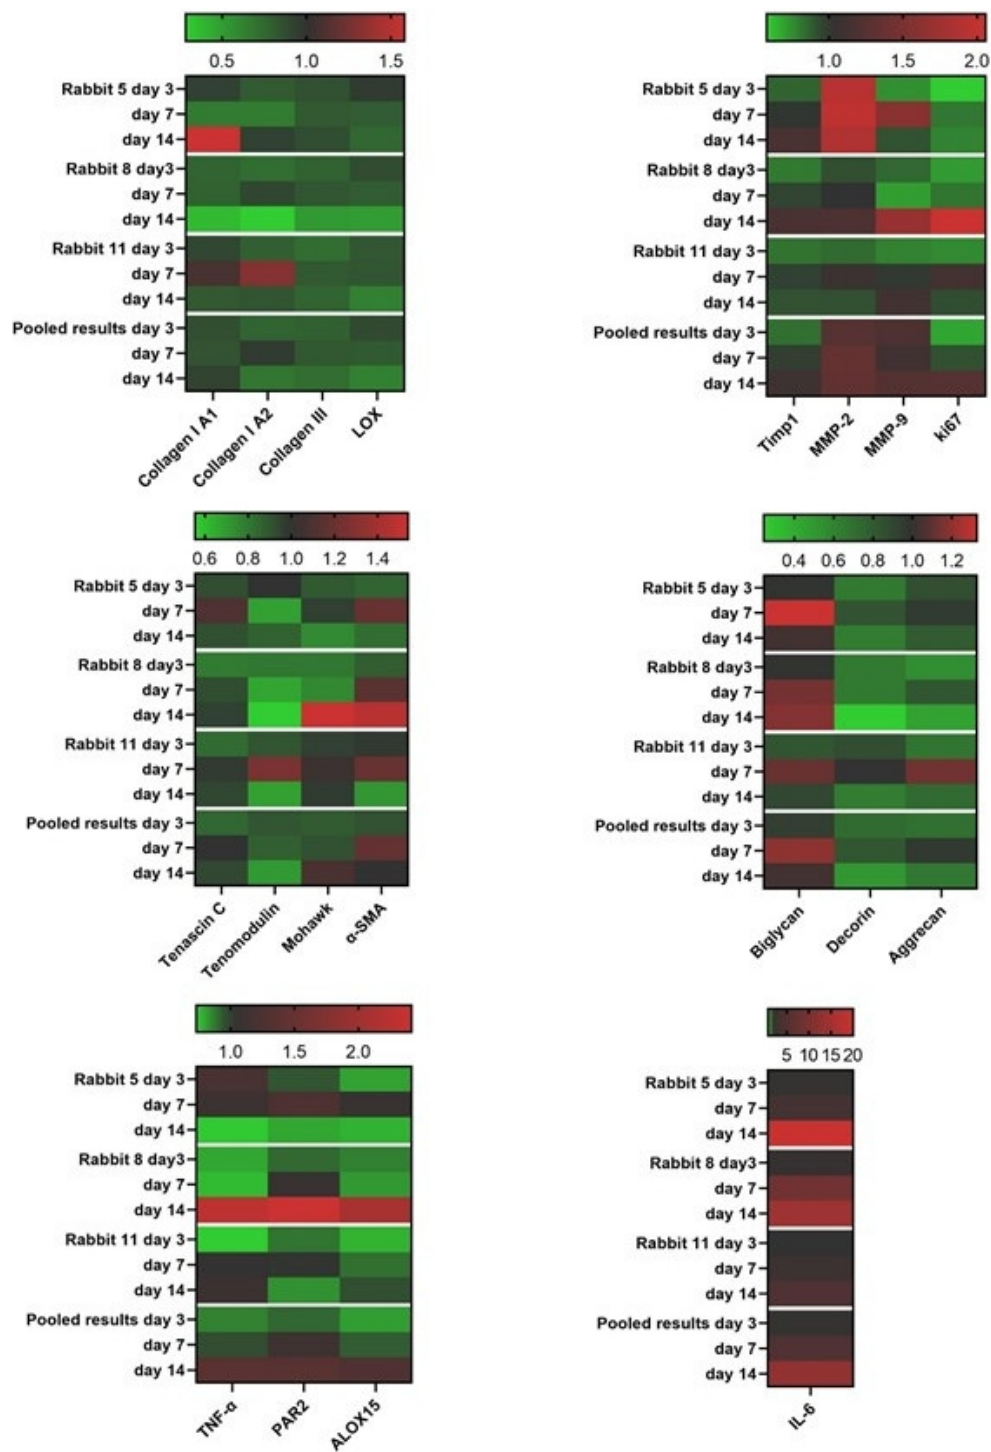

**Figure S1.** Heat Maps of qPCR results from tenocytes isolated from Achilles tendon of three different rabbits. Fields in green show downregulation of gene expression level, fields in red overexpression and black rectangles show no difference compared to cDNA isolated from tenocytes cultured in control medium without HA.

**Table S1.** Gene abbreviations, NCBI reference sequences of mRNAs (used as template for primer design), amplicon size and primer sequences used for Real-Time PCR Analysis.

| Gene          | mRNA ID (NCBI Reference Sequence) | Amplicon Size (bp) | Forward Primer Sequence (3'→ 5') | Reverse Primer Sequence (5'→ 3') |
|---------------|-----------------------------------|--------------------|----------------------------------|----------------------------------|
| 18s rRNA      | NR_033238.1                       | 176                | GGAAGTGAAGCCAT<br>GATTAAG        | CGGAAGTACGACGGT<br>ATCTG         |
| Col1A1        | XM_008271783.1                    | 271                | CTGGTGAATCTGGAC<br>GTGAG         | TGTCTCACCCTTGTC<br>CCAC          |
| Col1A2        | NM_001195668.1                    | 170                | CCAATCACGCCTCTC<br>AGAAC         | GCAGCCATCGACAAG<br>AACAG         |
| Col3A1        | XM_002712333.2                    | 259                | GCATTGCTTACATGG<br>ATCAGG        | CCAACGTCCGCACCA<br>AATTC         |
| LOX           | XM_008254949.1                    | 176                | TCCAGCCCGGCAAC<br>TACATT         | TATCCGTTGGGAGTT<br>GGGGC         |
| TNC           | FJ480400.1                        | 219                | GTCACATCATCACAGC<br>TCTGG        | CTGAGTGTGTATTCCG<br>TGGC         |
| TNMD          | NM_001109818.1                    | 239                | GCAGTTTCCGAGTTA<br>CAAGAC        | CGACGGCAGTAAATA<br>CAACAG        |
| DCN           | NM_001082330.1                    | 255                | GTGGACAATGGTTCT<br>CTGGC         | AAGGTGGATGGCTGG<br>ATCTC         |
| ACAN          | L38480.1                          | 113                | GCTACGGAGACAAG<br>GATGAG         | GTAAAAGACCTCACC<br>CTCCAT        |
| BGN           | NM_001195691.1                    | 199                | GGCCTGAAGCTCAAC<br>TACCT         | GGCTCCCGTTCTCAAT<br>CATC         |
| Mohawk        | NC_013684.1                       |                    | AACGTCGAGCAGTCT<br>CTGAG         | CACGCACTCTGGTAC<br>AGTTG         |
| $\alpha$ -SMA | NM_001101682.2                    | 224                | CGTGACTACTGCTGA<br>ACGTG         | GGATGCCAGCAGATT<br>CCATC         |
| MKI67         | XM_008251084.2                    | 283                | CACATCCAGCAGTGA<br>AACGG         | GTGTTAGCAGTACCT<br>GAAGTC        |
| TIMP1         | NM_001082232.2                    | 236                | CTACCTTGTACCAGC<br>GTTATG        | GAAGCTCAGACTGTT<br>CCAGG         |
| MMP2          | D63579.1                          | 220                | GAAGATCGACGCTGT<br>GTACG         | GTATCTCCAGAACTT<br>GTCTCC        |
| MMP9          | D26514.1                          | 160                | GATACAGCCTGTTCC<br>TCGTG         | GGACCATATAGATGC<br>TGGATG        |
| IL-6          | AF169176                          | 153                | GAAAACACCAGGGTC<br>AGCAT         | CAGCCACTGGTTTTT<br>CTGCT         |
| TNF- $\alpha$ | M12845                            | 138                | CTCCTACCCGAACAA<br>GGTCA         | CGGTCACCCTTCTCC<br>AACT          |
| PAR2=F2r11    | NW_003159481.1                    |                    | TTCCCGGCCTTCCTC<br>ACGG          | CTTCTGGGAGCTGAGC                 |
| ALOX15        | NM_001082282.1                    | 141                | CGACTTCGCCCTGCT<br>GGATA         | GCTGGATGACCATAG<br>GCATGA        |
| CD206         | XM_002717356.3                    | 198                | TGTCCAGAGGATTGG<br>GGCAC         | TTCATGGTAGCTCCC<br>GCCAG         |

**Abbreviations:** TNC = tenascin C, TNMD = tenomodulin, DCN = decorin, ACAN = aggrecan,

**BGN** = biglycan, **MKI67** = Ki67
